# Supplementary material
Source: MDPI journal article supplement (https://www.mdpi.com/2071-1050/14/1/323)
Supplement: s1 [file s1 › sustainability-1416003-supplementary.pdf]

The purpose of coating the  $\text{LiCoPO}_4$  by UiO-66 metal-organic framework is to enhance the electrochemical performance due to the MOF acts as a source of both carbon and metal atoms, which improves conductivity. So, we first prepared the UiO-66, as you see in the following figure, and the XRD confirmed that the sample is a single phase of UiO-66 without any impurities, and then we coated the  $\text{LiCoPO}_4$  by a small amount of UiO-66, So the uio-66 formed on the surface and did not appear in the XRD.

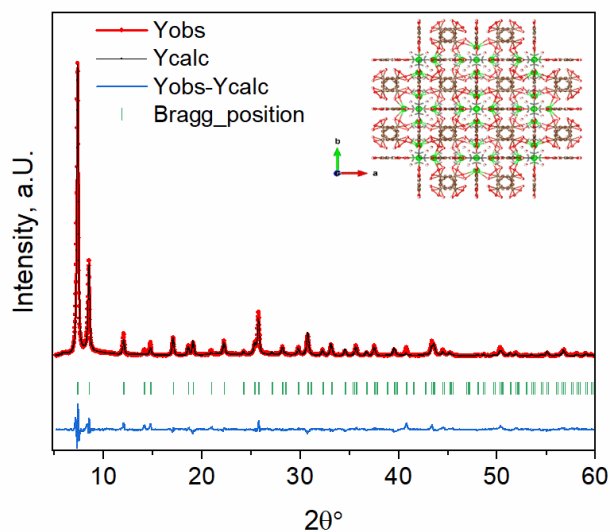

Figure S1. (a) Experimental (red) and calculated (black) profiles of the synthesized sample UiO-66. Vertical lines indicate calculated pick positions. A difference plot (blue) is provided at the bottom

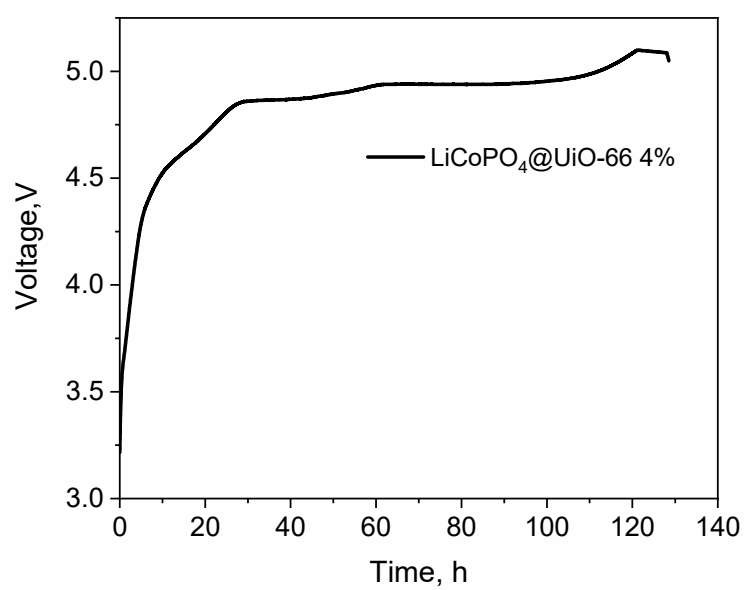

Figure S2. The electrochemical performance of  $\text{LiCoPO}_4@\text{UiO-66}$  with 4% additive.
